# Supplementary material
Source: PubMed Central journal article supplement (PMC5074852)
Supplement: NIHMS816526-supplement-401_2016_1616_MOESM1_ESM.pdf [file NIHMS816526-supplement-401_2016_1616_MOESM1_ESM.pdf]

**Activating NRF1-BRAF and ATG7-RAF1 fusions in anaplastic pleomorphic xanthoastrocytoma without BRAF p.V600E mutation**

Joanna J. Phillips<sup>1,2,3,\*</sup>, Henry Gong<sup>1</sup>, Katharine Chen<sup>1</sup>, Nancy M. Joseph<sup>4,5</sup>, Jessica van Ziffle<sup>4</sup>, Lee-Way Jin<sup>6,7</sup>, Boris C. Bastian<sup>3,4</sup>, Andrew W. Bollen<sup>2,3</sup>, Arie Perry<sup>1,2,3</sup>, Theodore Nicolaides<sup>1,8</sup>, David A. Solomon<sup>2,3,4</sup>, Joseph T.C. Shieh<sup>9,10</sup>

<sup>1</sup>Department of Neurological Surgery, University of California, San Francisco, CA

<sup>2</sup>Division of Neuropathology, Department of Pathology, University of California, San Francisco, CA

<sup>3</sup>Helen Diller Family Comprehensive Cancer Center, University of California, San Francisco, CA

<sup>4</sup>Clinical Cancer Genomics Laboratory, University of California, San Francisco, CA

<sup>5</sup>Department of Pathology, University of California, San Francisco, CA

<sup>6</sup>Department of Pathology and Laboratory Medicine, UC Davis Medical Center, Sacramento, CA

<sup>7</sup>M.I.N.D. (Medical Investigation of Neurodevelopmental Disorders) Institute, UC Davis Medical Center, Sacramento, CA

<sup>8</sup>Division of Pediatric Hematology/Oncology, Department of Pediatrics, University of California, San Francisco, CA

<sup>9</sup>Department of Pediatrics, Division of Medical Genetics, University of California, San Francisco, CA

<sup>10</sup>Institute for Human Genetics, University of California, San Francisco, CA

\*Corresponding author:  
University of California San Francisco  
Department of Neurological Surgery  
Helen Diller Family Cancer Building, HD492B  
San Francisco, CA 94143  
Phone 415-514-4929  
FAX 415-514-9792  
[joanna.phillips@ucsf.edu](mailto:joanna.phillips@ucsf.edu)

## SUPPLEMENTAL INFORMATION

### METHODS

**Immunohistochemistry.** Immunohistochemical assessment was performed using antibodies against: BRAFV600E (1:50, Spring Bioscience, Pleasanton, CA) and p-MAPK (#4370, 1:10000, Cell Signaling Technology, Inc, Danvers, MA). The presence or absence of staining and staining localization patterns were noted. For p-MAPK immunostained sections were scored as follows: 0, denotes no tumor cells positive; 1, less than 25% positive; 2, 25% - 75% positive; and 3, greater than 75% positive. Digital photomicrographs were taken using an Olympus DP72 camera.

**Genetic evaluation.** Capture-based next-generation sequencing (NGS) was performed at the UCSF Clinical Cancer Genomics Laboratory to target and analyze the coding regions of 510 cancer-related genes, select introns from 40 genes, and the *TERT* promoter, with a total sequencing footprint of 2.8 Mb (UCSF500 panel). Sanger sequencing validation of *NRF1-BRAF* fusion and KEAP1 variant in PXA#1 was performed using the primers listed in **Supplemental Table 4**.

**Tumor samples.** Cases were identified from the Brain Tumor Center Biorepository (Tissue Core) and the Department of Pathology, Division of Neuropathology at the University of California San Francisco. PXA#1 FFPE tumor tissue from two prior resections were obtained from the Department of Pathology and Laboratory Medicine, University of California Davis Medical Center, Sacramento, CA.

**Ethics statement.** The ethics approval number for the use of de-identified human biospecimens and autopsy material is 10-01318. These studies were in accordance with the ethical standards of the institutional research committee and with the 1964 Helsinki declaration and its later amendments. This article does not contain any studies with animals.

### SUPPLEMENTAL FIGURE

**Supplemental Fig 1.** Sanger sequencing validation of *NRF1-BRAF* fusion and KEAP1 variant in PXA#1 (**a,d**) and tumor tissue from resections 2 years (**b,d**) and 4 years (**c,f**) prior to the current resection. Only the *NRF1-BRAF* fusion was detected in prior resections.

**Supplemental Table 1.** Summary of the clinical, histopathologic features, genomic analysis, and MAPK analysis of the anaplastic PXA.

**Supplemental Table 2.** Somatic single nucleotide variants (SNVs) identified in tumors.

**Supplemental Table 3.** Primers used for variant analysis.

a

*NRF1-BRAF* fusion

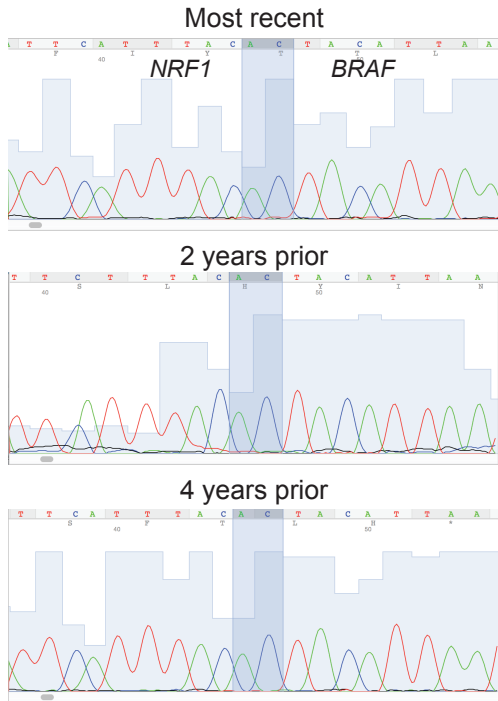

b

KEAP1 c.236T<A: p.V79D

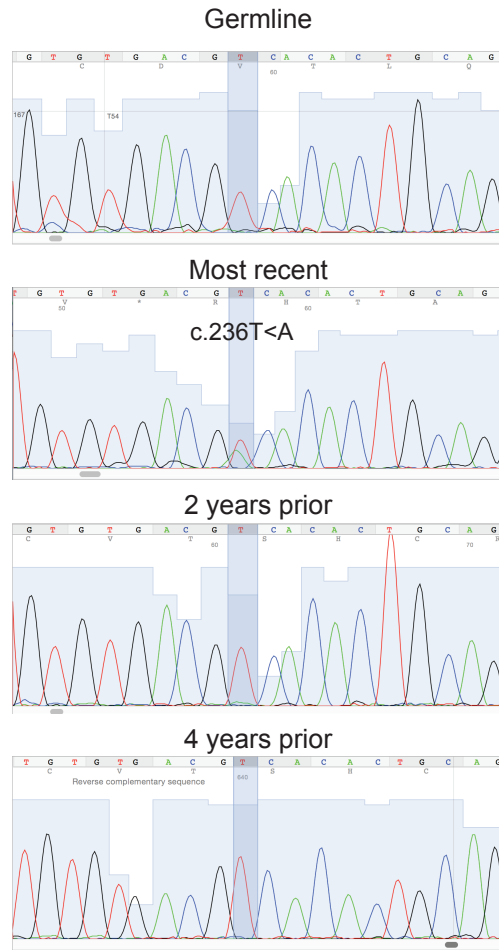

**Supplemental Table 1. Summary of the clinical, histopathologic, and genomic features of anaplastic PXA**

| PXA# | WHO Grade | Age at first diagnosis | Gender | Location | LM disease* | EGBs | Tumor cell infiltration# | Treatment | Prior resections | Recurrence/Progression | Follow-up (months) | Alive | BRAF p.V600E | RAF alteration | CDKN2A        | p-MAPK |
|------|-----------|------------------------|--------|----------|-------------|------|--------------------------|-----------|------------------|------------------------|--------------------|-------|--------------|----------------|---------------|--------|
| 1    | III       | 9                      | F      | T        | Present     | Y    | Present                  | GTR       | 2                | Yes                    | 48                 | No    | Absent       | NRF1-BRAF      | Deep deletion | +++    |
| 2    | III       | 19                     | M      | P        | Present     | Y    | Present                  | GTR       | None             | Yes                    | 15                 | Yes   | Absent       | ATG7-RAF1      | Deep deletion | +++    |

\*Denoted by histology or imaging.

#As determined by histopathologic and/or immunohistologic evaluation.

Abbreviations: T = temporal, P = parietal; GTR=gross total resection; LM = leptomeningeal; EGB = Eosinophilic granular body

Phillips JJ et al., RAF activating fusions in anaplastic PXA

**Supplemental Table 2.** Single nucleotide variants (SNVs) identified in tumors.

| PXA# | CHROM | POS        | REF | ALT | Function | Gene           | Variant         | TranscriptID | Classification | Total Reads | Tumor mutant allele frequency | Exonic function   | COSMIC |
|------|-------|------------|-----|-----|----------|----------------|-----------------|--------------|----------------|-------------|-------------------------------|-------------------|--------|
| 1    | chr19 | 10,610,474 | A   | T   | exonic   | <i>KEAP1</i>   | KEAP1 p.V79D    | NM_203500    | VUS            | 310         | 11%                           | nonsynonymous SNV | No     |
| 1    | chr19 | 11,101,922 | C   | T   | exonic   | <i>SMARCA4</i> | SMARCA4 p.R448C | NM_001128844 | VUS            | 91          | 4%                            | nonsynonymous SNV | No     |
| 2    | chr17 | 7,577,120  | C   | T   | exonic   | <i>TP53</i>    | TP53 p.R273H    | NM_000546    | Pathogenic     | 181         | 8%                            | nonsynonymous SNV | Yes    |

Phillips JJ et al., RAF activating fusions in anaplastic PXA

**Supplemental Table 3.** Primers used for variant analysis.

| Gene             | Variant             | Primers used                                                               |
|------------------|---------------------|----------------------------------------------------------------------------|
| <i>KEAPI</i>     | <i>KEAPI</i> p.V79D | Forward: CCTTCAGCTACACCCTGGAG                                              |
| <i>KEAPI</i>     | <i>KEAPI</i> p.V79D | Reverse: AACATGGCCTTGAAGACAGG                                              |
| <i>NRF1-BRAF</i> | Fusion              | Forward: TTGGAGGAGGTTGAGATAAAGC<br>Nested: GAGGTTGAGATAAAGCTTAGCAA         |
| <i>NRF1-BRAF</i> | Fusion              | Reverse: AGAGAACAGATGATGCTAGAAAGTGT<br>Nested: AACAGATGATGCTAGAAAGTGTAATAA |
